# Supplementary material
Source: publisher figshare collection journal article supplement (https://tandf.figshare.com/ndownloader/files/16702259)
Supplement: Supplementary file 1 [file 16702259]

Appendix Table 1: Physician visit codes used to ascertain medical oncology and radiation oncology physician visits

|  | **HCFASPEC*** | **CPT codes** |
| --- | --- | --- |
| Medical oncology | 83 (hematology/oncology),  90 (medical oncology) | 99201-99205, 99211-99215, 99218-99220, 99234-99236, 99241-99245, 99381-99387, 99391-99397, 99401-99404, 99406-99409, 99411, 99412, 99420, 99429, 99455, 99456 |
| Radiation oncology | 92 (radiation oncology),  30 (diagnostic radiology) | 77261-77263, 77371-77425, 77401-77421, 77427-77499, 77280-77299 |

*Medicare provider specialty codes

**Appendix Table 2: Diagnostic and procedure codes used to determine receipt of radiation therapy or chemotherapy**

|  | **ICD-9CM procedure codes** | **CPT codes and HCPCS codes** |
| --- | --- | --- |
| Radiation therapy | v58.0, v66.1, v67.1,  92.21, 92.29 | 77401-77499, 77750-77799, G0256, G0261 |
| Chemotherapy | v58.1, E933.1, E930.7,  99.25 | Q0083, Q0084, Q0085, Q2048, Q2049, Q2050, J1950, C9131, C9292, S0156, 96400-96549, J9000-J9999, G0355, G0356, G0357, G0358, G0359, G0360, G0361, G0362 |

**Appendix Table 3: Multivariate analysis of non-receipt of treatment in patients who saw a clinically appropriate provider**

|  | **Hormone therapy cohort**  ORa 95% CI P-Value | **Chemotherapy cohort**  ORa 95% CI P-Value | **Radiation therapy cohort** ORa 95% CI P-Value |
| --- | --- | --- | --- |
| *Age*  65-69  70-74  75-79  > 80 | 1.0  0.87 0.73-1.04 0.136  1.16 0.97-1.40 0.098  **1.88 1.58-2.22 <.0001** |  |  |
| *Diagnosis Year* | **0.90 0.87-0.94 <.0001** | **1.06 1.00-1.12 0.045** | 1.00 0.98-1.03 0.920 |
| *Race*  White  Black  Hispanic  Unknown | 1.0  1.17 0.92-1.49 0.211 0.69 0.42-1.14 0.148 0.77 0.57-1.04 0.093 | 1.0  0.96 0.63-1.48 0.867 0.58 0.12-2.84 0.499  0.54 0.22-1.33 0.180 | 1.0  0.96 0.72-1.29 0.793 0.56 0.20-1.54 0.264  1.33 0.96-1.84 0.090 |
| *Marital Status*  Married  Single  Unknown | 1.0  1.13 0.99-1.30 0.064 1.03 0.75-1.42 0.869 | 1.0  1.18 0.85-1.62 0.330  1.56 0.70-3.49 0.281 | 1.0  1.12 0.96-1.30 0.148  0.96 0.62-1.48 0.847 |
| *Residency*  Urban  Rural | 1.0  1.10 0.91-1.34 0.323 | 1.0  0.72 0.42-1.23 0.230 | 1.0  1.11 0.86-1.43 0.412 |
| *Comorbidity (CCS)*  0  1  > 2 | 1.0  **1.16 1.00-1.33 0.046**  **1.26 1.07-1.48 0.005** | 1.0  0.88 0.60-1.26 0.460 **1.70 1.12-2.61 0.014** | 1.0  **1.29 1.09-1.53 0.004**  **1.52 1.22-1.89 0.0002** |
| *SES*  0 (Low)  1  2  3  4 (High) | 1.0  1.00 0.83-1.21 0.986  1.05 0.86-1.30 0.622  1.00 0.83-1.21 0.992  0.93 0.76-1.15 0.520 | 1.0  1.06 0.69-1.61 0.803  0.69 0.41-1.15 0.155  0.73 0.43-1.22 0.224  0.76 0.43-1.34 0.343 | 1.0  0.89 0.71-1.11 0.288  0.94 0.73-1.20 0.594  **0.73 0.57-0.92 0.009**  1.00 0.78-1.28 0.997 |
| *Tumor Stage*  Stage I  Stage II  Stage III | 1.0  **0.73 0.64-0.83 <.0001**  0.83 0.66-1.06 0.135 | 1.0  0.84 0.57-1.23 0.361 | 1.0  **1.39 1.19-1.63 <.0001**  1.03 0.75-1.42 0.853 |
| *Tumor Grade*  Low  High  Unknown | 1.0  1.14 0.98-1.32 0.091  1.19 0.88-1.62 0.268 | 1.0  0.79 0.53-1.17 0.241  **2.55 1.22-5.34 0.013** | 1.0  0.98 0.81-1.18 0.796  **1.46 1.09-1.97 0.012** |
| *ER/PR*  Positive  Negative  Unknown |  |  | 1.0  0.89 0.70-1.14 0.351  **1.42 1.07-1.91 0.017** |
| *MDC*  No  Yes | 1.0  **0.84 0.72-0.97 0.017** | 1.0  **0.50 0.34-0.74 0.0004** | 1.0  **0.73 0.54-0.98 0.034** |

CCS: Charlson Comorbidity Score; SES: socioeconomic status; ER: estrogen receptor; PR: progesterone receptor; MDC: multidisciplinary care

a Bolded ORs have a *p*<0.05
